# Supplementary material for: Defining the Criteria for Reflex Testing for BRAF Mutations in Cutaneous Melanoma Patients
Source: MDPI journal article supplement (doi:10.3390/cancers13092282), 2021-05-10
Supplement: s1 [file s1]

## SUPPLEMENTARY MATERIALS

**Table S1.** Simplified overview of the pathologic staging of melanoma (American Joint Committee on Cancer 8<sup>th</sup> edition).

| Stage |   | Tumor                                                                                                                                                             | Nodes                                                                                                                                                                                                                                                                    | Metastases                     |
|-------|---|-------------------------------------------------------------------------------------------------------------------------------------------------------------------|--------------------------------------------------------------------------------------------------------------------------------------------------------------------------------------------------------------------------------------------------------------------------|--------------------------------|
| 0     |   | Melanoma in situ                                                                                                                                                  | None                                                                                                                                                                                                                                                                     | None                           |
| I     | A | ≤ 1mm, +/- ulceration                                                                                                                                             | None                                                                                                                                                                                                                                                                     | None                           |
| I     | B | 1 to 2mm, no ulceration                                                                                                                                           | None                                                                                                                                                                                                                                                                     | None                           |
| II    | A | 1 to 2 mm, + ulceration<br>2 to 4mm, no ulceration                                                                                                                | None                                                                                                                                                                                                                                                                     | None                           |
| II    | B | 2 to 4mm, + ulceration<br>>4mm, no ulceration                                                                                                                     | None                                                                                                                                                                                                                                                                     | None                           |
| II    | C | >4mm, + ulceration                                                                                                                                                | None                                                                                                                                                                                                                                                                     | None                           |
| III   | A | Up to 1mm +/- ulceration<br>1 to 2mm, no ulceration                                                                                                               | 1 to 3 clinically occult nodes                                                                                                                                                                                                                                           | None                           |
| III   | B | No evidence of primary<br>Up to 2mm +/- ulceration<br>2 to 4 mm, no ulceration                                                                                    | 1 clinically detected node,<br>OR evidence of ILD *<br>Up to 3 tumor-involved nodes,<br>OR evidence of ILD                                                                                                                                                               | None                           |
| III   | C | No evidence of primary<br>Up to 2mm +/- ulceration<br>OR 2 to 4mm, no ulceration<br>2 to 4mm +/- ulceration<br>OR > 4.0mm, no ulceration<br>> 4.0mm, + ulceration | >2 tumor-involved nodes,<br>OR ILD reaching nearby nodes,<br>OR matted nodes<br>≥ 4 tumor-involved nodes,<br>OR ILD reaching nearby nodes,<br>OR ≥ 1 matted node<br>≥ 1 tumor-involved node,<br>+/- evidence of ILD<br>1 to 3 tumor-involved nodes<br>OR evidence of ILD | None                           |
| III   | D | > 4.0mm, + ulceration                                                                                                                                             | ≥ 4 tumor-involved nodes<br>ILD reaching ≥ 2 nearby nodes<br>≥ 1 matted node                                                                                                                                                                                             | None                           |
| IV    |   | Any                                                                                                                                                               | Any                                                                                                                                                                                                                                                                      | Evidence of distant metastases |

\*ILD: Intralymphatic disease refers to in-transit, satellite and/or microsatellite metastases.

**Table S2.** Summary of targeted therapy trials in the treatment of unresected stage III or IV melanoma and resected melanoma. NR: not reported.

| RESECTABLE MELANOMA                                             |                                                                                                   |                                 |                              |                      |                                                                                       |                                                   |
|-----------------------------------------------------------------|---------------------------------------------------------------------------------------------------|---------------------------------|------------------------------|----------------------|---------------------------------------------------------------------------------------|---------------------------------------------------|
| Trial<br>Drugs compared<br>N                                    | Patients included                                                                                 | Treatment                       | Median follow-up<br>(months) | Response rate<br>(%) | Recurrence-free survival<br>(%)                                                       | Overall survival (%)                              |
| COMBI-AD<br>[1,2]<br><br>Dabrafenib + Trametinib versus placebo | Completely resected BRAF+ stage IIIA melanoma with LN metastasis ≥1mm, stage IIIB melanoma, stage | Dabrafenib + Trametinib (n=438) | 60 months                    | NA                   | 88% at 1 year<br>67% at 2 years<br>58% at 3 years<br>55% at 4 years<br>52% at 5 years | 97% at 1 year<br>91% at 2 years<br>86% at 3 years |

|                                                                      |                                                                                    |                                                   |                                         |                                                                                |                                                                                                                      |                                                                                                |
|----------------------------------------------------------------------|------------------------------------------------------------------------------------|---------------------------------------------------|-----------------------------------------|--------------------------------------------------------------------------------|----------------------------------------------------------------------------------------------------------------------|------------------------------------------------------------------------------------------------|
| N=870                                                                | IIIC melanoma (ac-<br>cording to AJCC 7)                                           |                                                   |                                         | Median RFS<br>NR<br>(HR versus pla-<br>cebo = 0.51<br>[95%CI = 0.42-<br>0.61]) |                                                                                                                      |                                                                                                |
|                                                                      |                                                                                    | Placebo<br>(n=432)                                | 58<br>months                            | NA                                                                             | 56% at 1 year<br>44% at 2 years<br>39% at 3 years<br>38% at 4 years<br>36% at 5 years<br>Median RFS =<br>16.6 months | 94% at 1 year<br>83% at 2 years<br>77% at 3 years                                              |
| DFS*:                                                                |                                                                                    |                                                   |                                         |                                                                                |                                                                                                                      |                                                                                                |
| BRIM 8 [3]                                                           | Cohort 1: stage IIC-<br>IIIB melanoma (ac-<br>cording to AJCC 7)                   | Vemuraf-<br>enib<br>(n=157)                       | 30.8<br>months                          | NA                                                                             | 84% at 1 year<br>72% at 2 years                                                                                      | 93% at 2 years                                                                                 |
|                                                                      |                                                                                    | Placebo<br>(n=157)                                |                                         | NA                                                                             | Median = NR<br>66% at 1 year<br>57% at 2 years<br>Median 36.9<br>months                                              | 87% at 2 years                                                                                 |
|                                                                      | Cohort 2: stage IIIC<br>melanoma (according<br>to AJCC 7)                          | Vemuraf-<br>enib (n=93)                           | 33.5<br>months                          | NA                                                                             | Median DFS =<br>23.1 months<br>(HR versus pla-<br>cebo = 0.80<br>[95% CI 0.54-<br>1.18], p = 0.26)                   | 84% at 2 years                                                                                 |
|                                                                      |                                                                                    | Placebo<br>(n=91)                                 |                                         | NA                                                                             | 58% at 1 year<br>48% at 2 years<br>Median DFS =<br>15.4 months                                                       | 85% at 2 years                                                                                 |
| UNRESECTED MELANOMA                                                  |                                                                                    |                                                   |                                         |                                                                                |                                                                                                                      |                                                                                                |
| Trial<br>Drugs com-<br>pared<br>N                                    | Patients included                                                                  | Treatment                                         | Median<br>follow-<br>up<br>(months<br>) | Re-<br>spons<br>e rate<br>(%)                                                  | Progression-<br>free survival<br>(months) [95%<br>CI]                                                                | Overall sur-<br>vival (months)<br>[95% CI]                                                     |
| CoBRIM [4]                                                           | BRAF+ melanoma, un-<br>resected stage IIIC or<br>stage IV, previously<br>untreated | Cobi-<br>metinib +<br>Vemuraf-<br>enib<br>(n=247) | 14.2                                    | ORR =<br>70<br>CR =<br>16                                                      | 12.3<br>[9.5-13.4]                                                                                                   | 75% at 1 year<br>48% at 2 years                                                                |
| Cobimetinib +<br>Vemurafenib<br>versus Vemu-<br>rafenib<br><br>N=495 |                                                                                    |                                                   | (18.5 for<br>OS anal-<br>ysis)          |                                                                                | 0.58 [95% CI =<br>0.46-0.72] p<br><0.0001)                                                                           | Median = 22.3<br>[20.3-not esti-<br>mable]<br><br>(HR versus<br>Vemurafenib =<br>0.70 [95%CI = |

|                            |                                                                                                                               |                                   |                         |                       |                                                                                  |                                                                                                 |                                                                                  |
|----------------------------|-------------------------------------------------------------------------------------------------------------------------------|-----------------------------------|-------------------------|-----------------------|----------------------------------------------------------------------------------|-------------------------------------------------------------------------------------------------|----------------------------------------------------------------------------------|
|                            |                                                                                                                               |                                   |                         |                       |                                                                                  |                                                                                                 | 0.55-0.90], p = 0.005)                                                           |
|                            |                                                                                                                               |                                   |                         |                       |                                                                                  |                                                                                                 | 64% at 1 year<br>38% at 2 years                                                  |
|                            |                                                                                                                               | Vemurafenib (n=248)               |                         | ORR = 50<br>CR = 10   | 7.2<br>[5.6-7.5]                                                                 |                                                                                                 | Median = 17.4<br>[95% CI = 15.0-19.8]                                            |
|                            |                                                                                                                               |                                   |                         |                       |                                                                                  | 56% at 1 year<br>37% at 2 years<br>29% at 3 years                                               | 76% at 1 year<br>58% at 2 years<br>47% at 3 years                                |
|                            |                                                                                                                               | Encorafenib + Binimetinib (n=192) | 32.1 (PFS)<br>48.8 (OS) | ORR = 64<br>CR = 13   | Median = 14.9<br>[11.0-20.2] (HR versus Vemurafenib = 0.51 [95% CI = 0.39-0.67]) |                                                                                                 | Median = 33.6<br>[24.4-39.2] (HR versus Vemurafenib = 0.61 [95% CI = 0.48-0.79]) |
| <b>COLUMBUS [5]</b>        | BRAF+ melanoma, unresected stage IIIB, IIIC or IV, treatment naïve or had progressed after previous first-line immunotherapy, | Vemurafenib (n=191)               |                         | ORR = 41<br>CR = 8    | 32% at 1 year<br>20% at 2 years<br>14% at 3 years<br>Median = 7.3 [5.6-7.9]      |                                                                                                 | 63% at 1 year<br>43% at 2 years<br>31% at 3 years<br>Median = 16.9 [14.0-24.5]   |
|                            | N=577                                                                                                                         | Encorafenib (n=194)               |                         | ORR = 52<br>CR = 7    | Median = 9.6 [7.4-14.8]                                                          |                                                                                                 | Median = 23.5 [19.6-33.6]                                                        |
|                            |                                                                                                                               |                                   |                         |                       |                                                                                  | 74% at 1 year<br>51% at 2 years                                                                 |                                                                                  |
|                            |                                                                                                                               |                                   |                         |                       |                                                                                  | Median 11.0 [8.0-13.9]                                                                          |                                                                                  |
|                            |                                                                                                                               |                                   |                         |                       |                                                                                  | (HR versus Dabrafenib = 0.67 [95% CI = 0.53-0.84], p = 0.0004)                                  |                                                                                  |
| <b>COMBI-d [6]</b>         | BRAF+ melanoma, unresected stage IIIC or stage IV melanoma, no prior systemic therapy                                         | Dabrafenib + Trametinib (n=211)   | 20 (time on study)      | ORR = 69<br>CR = 16%  |                                                                                  | Median = 25.1 [19.2-not reached] (HR versus Dabrafenib = 0.71 [95% CI = 0.55-0.92], p = 0.0107) |                                                                                  |
|                            | N=423                                                                                                                         |                                   |                         |                       |                                                                                  |                                                                                                 |                                                                                  |
|                            |                                                                                                                               | Dabrafenib (n=212)                | 16 (time on study)      | ORR = 53%<br>CR = 13% | Median = 8.8 [5.9-9.3]                                                           |                                                                                                 | 68% at 1 year<br>42% at 2 years<br>Median = 18.7 [15.2-23.7]                     |
|                            |                                                                                                                               |                                   |                         |                       |                                                                                  | Median = 11.4                                                                                   | 72% at 1 year                                                                    |
|                            |                                                                                                                               |                                   |                         |                       |                                                                                  | (HR versus Vemurafenib = 0.56 [95% CI = 0.46-0.69], p <0.001)                                   |                                                                                  |
| <b>COMBI-v [7]</b>         | BRAF+ melanoma, unresected stage IIIC or stage IV melanoma, no prior systemic therapy                                         | Dabrafenib + Trametinib (n=352)   | 11                      | ORR = 64<br>CR = 13%  |                                                                                  | Median = not reached (HR versus Vemurafenib = 0.69 [95% CI = 0.53-0.89], p = 0.005)             |                                                                                  |
|                            |                                                                                                                               | Vemurafenib (n=352)               | 10                      | ORR = 51<br>CR = 8%   | Median = 7.3                                                                     |                                                                                                 | 65% at 1 year<br>Median = 17.2                                                   |
|                            |                                                                                                                               |                                   |                         |                       |                                                                                  |                                                                                                 |                                                                                  |
| <b>COMBI-d and COMBI-v</b> | BRAF+ melanoma, unresected stage IIIC or stage IV melanoma,                                                                   | Dabrafenib +                      | 22                      | ORR = 68%             | 31% at 2 years<br>24% at 3 years<br>21% at 4 years                               |                                                                                                 | 52% at 2 years<br>44% at 3 years<br>37% at 4 years                               |

|                                                    |     |                       |                      |                |                |
|----------------------------------------------------|-----|-----------------------|----------------------|----------------|----------------|
| (pooled analysis) [8]<br>no prior systemic therapy | apy | Trametinib<br>(n=563) | CR = 19%             | 19% at 5 years | 34% at 5 years |
|                                                    |     |                       | Median = 11.1 months |                |                |

Because of the prespecified hierarchical testing of cohort 2 before cohort 1, and because the primary endpoint was not met in cohort 2, the analyses in cohort 1 cannot be regarded as significant.

Overall Response Rate (ORR) = overall response rate; CR = complete response rate; Duration Free Survival (DFS) measured in BRIM8.

## References:

1. Long GV et al. Adjuvant Dabrafenib plus Trametinib in Stage III BRAF-Mutated Melanoma. *NEJM*. 2017. 377: 1813-1823.
2. Dummer R et al. Five-Year Analysis of Adjuvant Dabrafenib + Trametinib in Stage III Melanoma. *NEJM*. 2020. 383: 1139-1148.
3. Maio M et al. Adjuvant vemurafenib in resected, BRAFv600 mutation-positive melanoma (BRIM8) : a randomized, double-blind, placebo-controlled, multicentre, phase 3 trial. *Lancet Oncology*. 2018. 19: 510-520.
4. Ascierto PA et al. Cobimetinib combined with vemurafenib in advanced BRAFv600-mutant melanoma (coBRIM) : updated efficacy results from a randomized, double-blind, phase 3 trial. *Lancet Oncology*. 2016. 17: 1248-1260.
5. Ascierto PA et al. Update on tolerability and overall survival in COLUMBUS: landmark analysis of a randomized phase 3 trial of encorafenib plus binimetinib vs vemurafenib or encorafenib in patients with BRAF V600-mutant melanoma. *European Journal of Cancer*. 2020. 126: 33-44.
6. Long GV et al. Dabrafenib plus trametinib versus dabrafenib and placebo for Val600 BRAF-mutant melanoma: a multicenter, double-blind, phase 3 randomised controlled trial. *The Lancet*. 2016. 386 (9992): 444-451.
7. Robert C. et al. Improved Overall Survival in Melanoma with Combined Dabrafenib + Trametinib. *NEJM*. 2015. 372: 30-39.
8. Robert C et al. Five-year Outcomes with Dabrafenib plus Trametinib in Metastatic Melanoma. *NEJM*. 2019. 381: 626-636.
